# Supplementary material for: HiQ-LAI: a high-quality reprocessed MODIS leaf area index dataset with better spatiotemporal consistency from 2000 to 2022
Source: Copernicus journal article supplement (doi:10.5194/essd-16-1601-2024), 2024-03-26
Supplement: Supplementary file 1 [file essd-16-1601-2024-supplement.pdf]

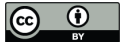

*Supplement of*

## **HiQ-LAI: a high-quality reprocessed MODIS leaf area index dataset with better spatiotemporal consistency from 2000 to 2022**

**Kai Yan et al.**

*Correspondence to:* Kai Yan ([kaiyan@bnu.edu.cn](mailto:kaiyan@bnu.edu.cn)) and Jingrui Wang ([jingruiwang@email.cugb.edu.cn](mailto:jingruiwang@email.cugb.edu.cn))

The copyright of individual parts of the supplement might differ from the article licence.

Supplementary.

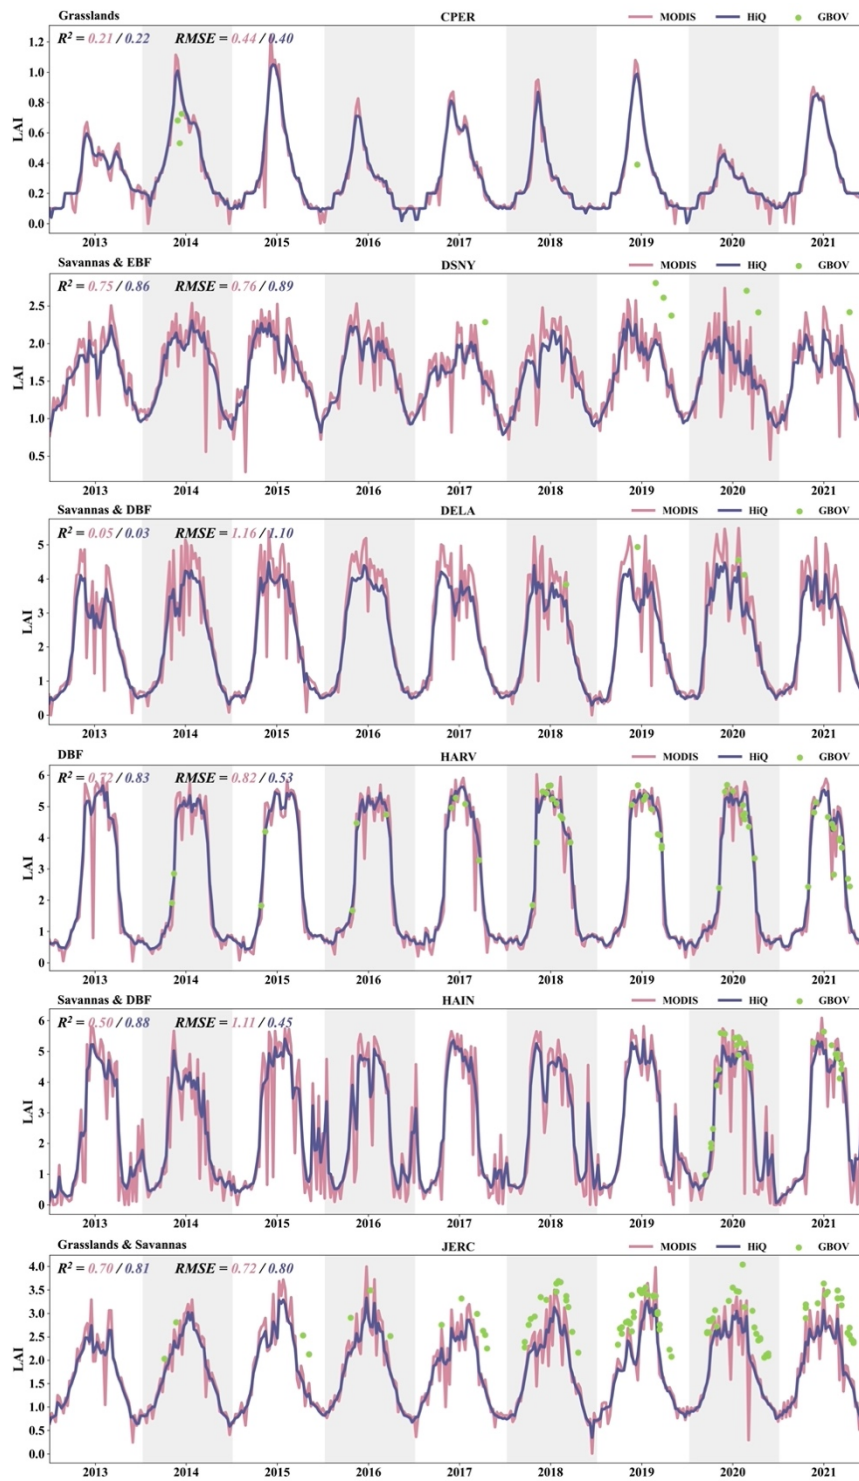

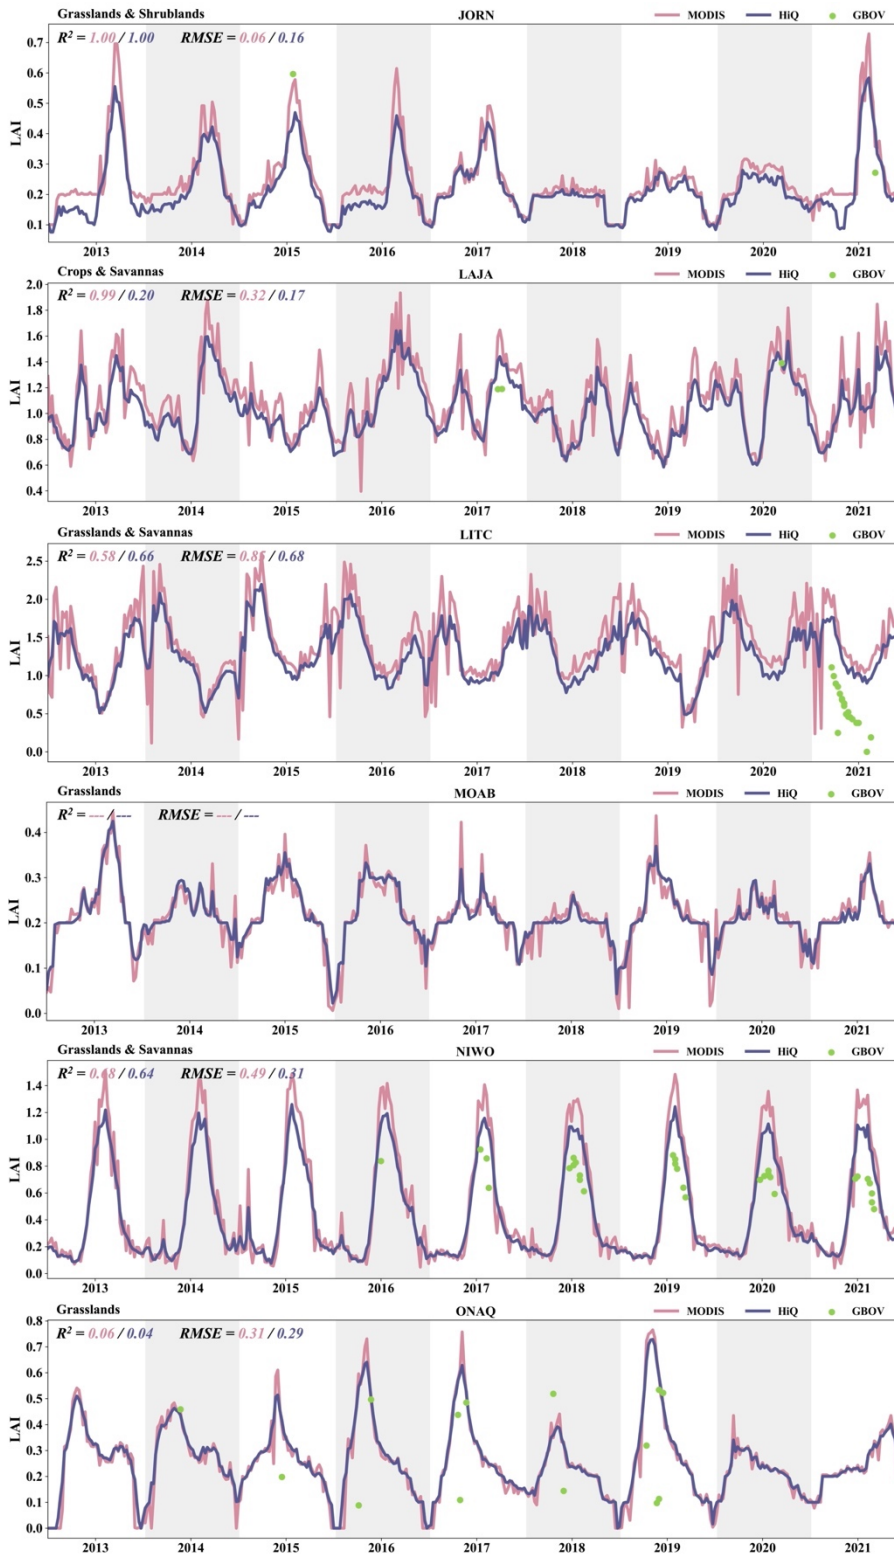

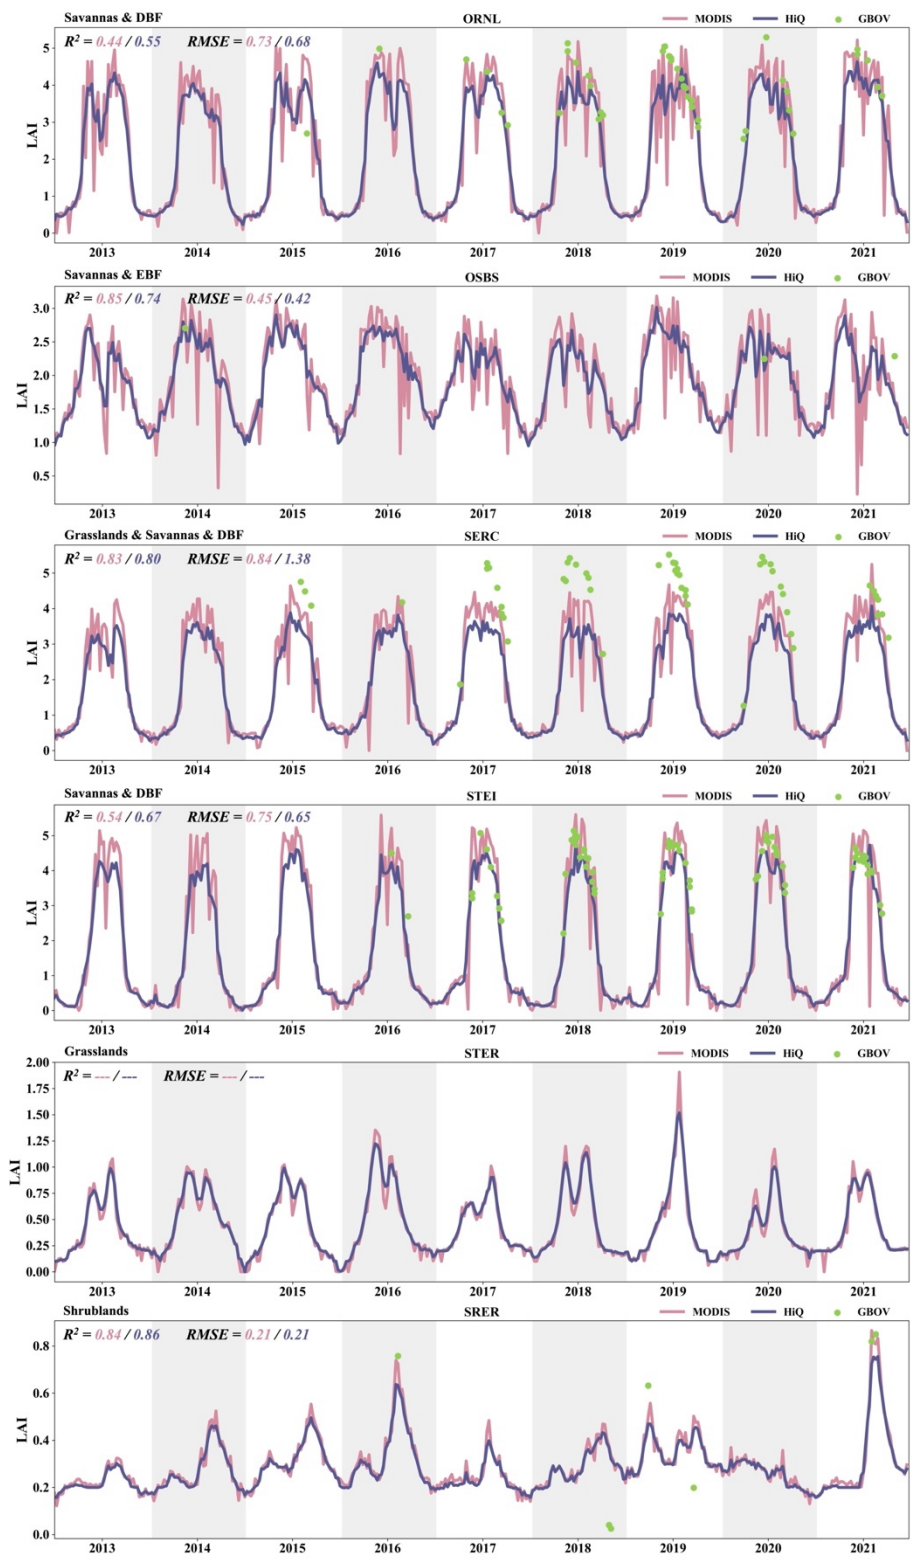

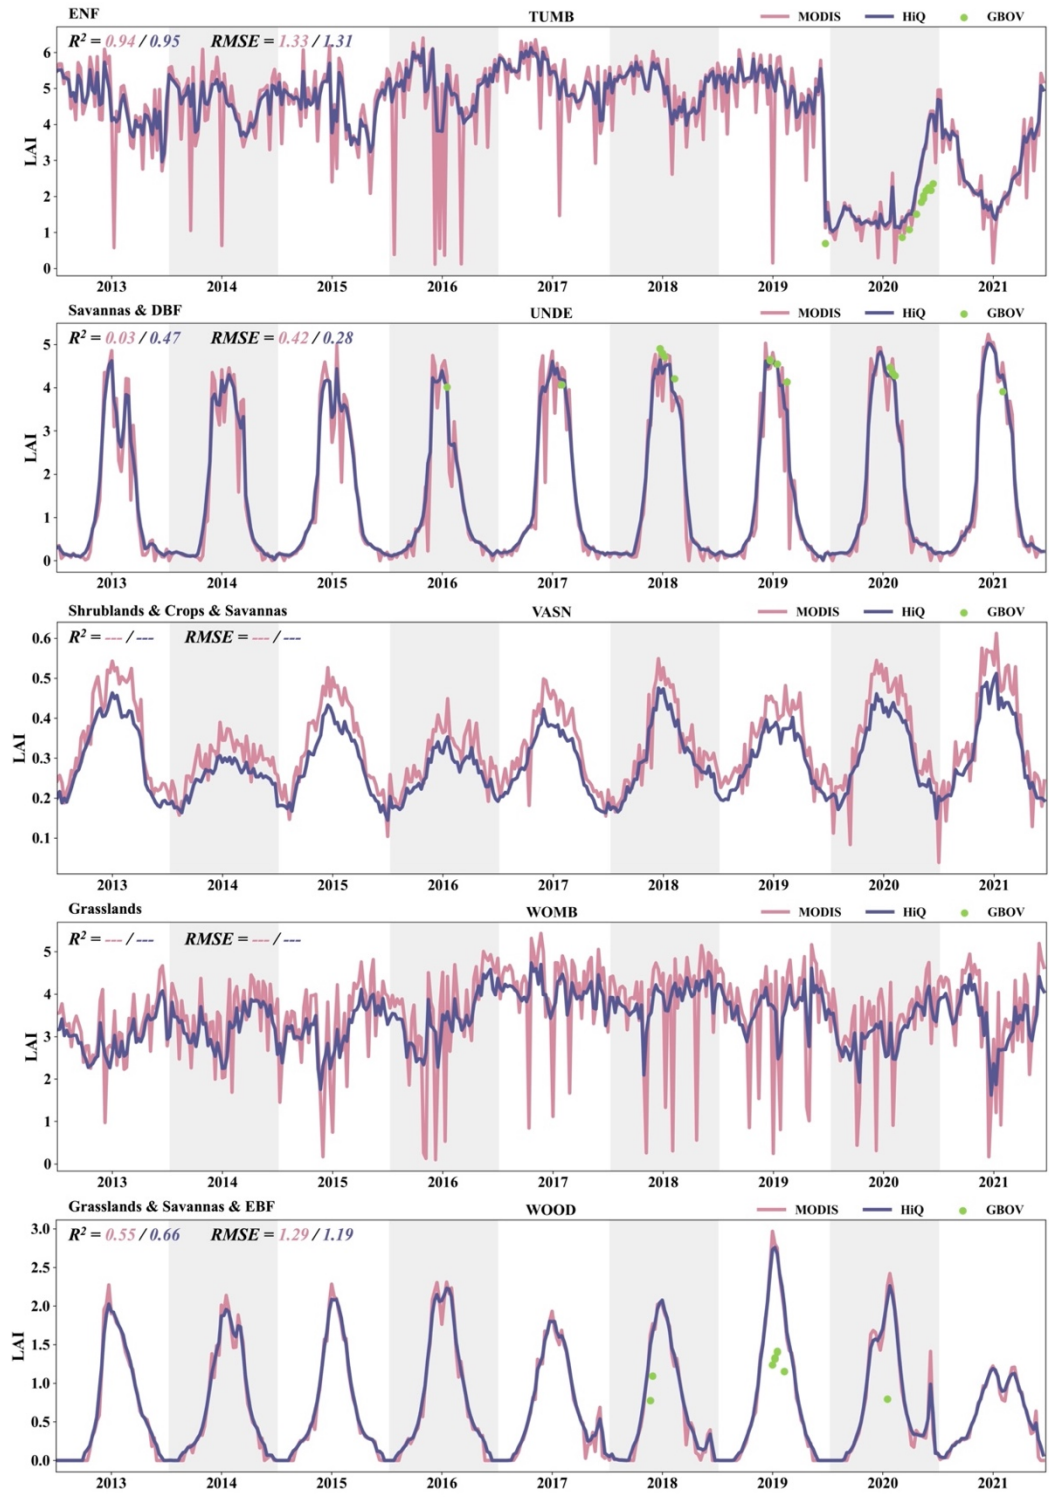

Figure S1 Same as Fig. 5 but for other 25 sites.
